# Supplementary material
Source: PubMed Central journal article supplement (PMC8371303)
Supplement: sj-pdf-1-ebm-10.1177_1535370221995154.pdf [file sj-pdf-1-ebm-10.1177_1535370221995154.pdf]

**Bacteriophages immunomodulate the response of monocytes:**

1  
2  
3  
4  
5  
6  
7  
8  
9  
10  
11  
12  
13  
14  
15  
16  
17  
18  
19  
20  
21  
22  
23

Short running title: Immunogenicity of bacteriophages

Lidia Perea<sup>1\*</sup>, Lorena Rodríguez-Rubio<sup>2\*</sup>, Juan C Nieto<sup>1</sup>, Carlos Zamora<sup>1</sup>, Elisabet Cantó<sup>1</sup>, German Soriano<sup>3</sup>, Maria Poca<sup>3</sup>, Pedro Blanco-Picazo<sup>2</sup>, Ferran Navarro<sup>4</sup>, Maite Muniesa<sup>2</sup>, Silvia Vidal<sup>1</sup>

**SUPPLEMENTARY MATERIAL FOR REVIEW**

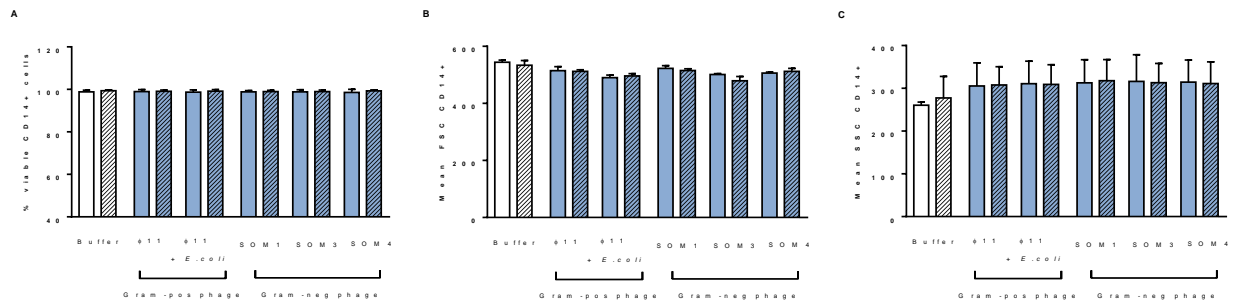

24

25 **Supplementary Figure 1. Confirmation of the non-effect of butanol buffer or the phage suspensions**  
 26 **on (A) the percentage of viable cells, (B) the size measured by the mean Forward Scatter (FSC) and (C)**  
 27 **the granularity measured by the Side Scatter (SSC) in CD14<sup>+</sup> cells stimulated with 1/100 butanol buffer or**  
 28 **1/100 butanol-purified phages, without adding polymyxin B (polyB; solid bar) or after adding polyB**  
 29 **(stripe pattern).**

30

31

32

33

34

35

36

37

38

39

40

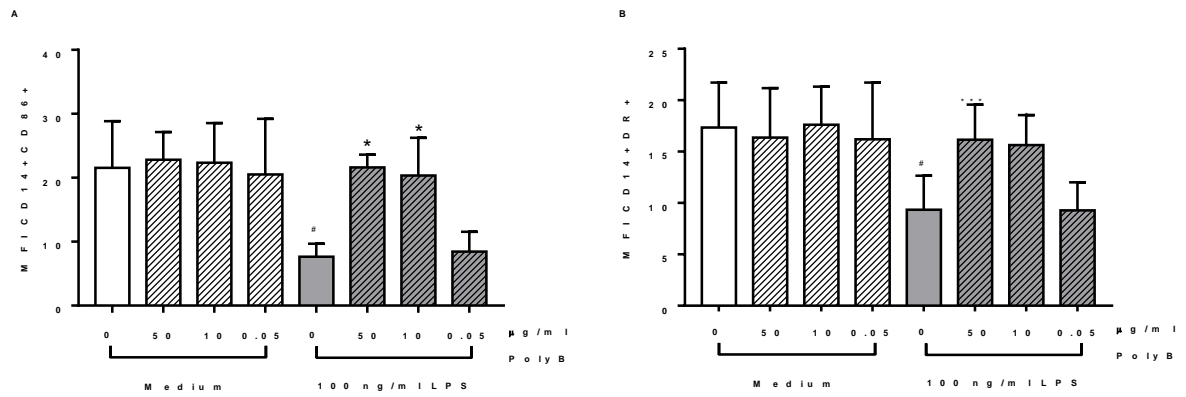

41

42 **Supplementary Figure 2. Confirmation of the efficiency of polymyxin B.** PBMCs were cultured with  
 43 RPMI-HEPES alone (white bar) or with 50, 10 and 0.05 µg/ml of polymyxin B (stripe pattern) for 30  
 44 minutes at 37°C before stimulation with 100 ng/ml LPS (grey bar) for 24h at 37°C. The expression of (A)  
 45 CD86 and (B) HLA-DR were analyzed in CD14<sup>+</sup> (monocytes). \*<0.05; \*\*<0.01; \*\*\*<0.001; \*LPS vs  
 46 LPS with polyB; #Medium vs LPS.

47

48

49

50

51

52

53

54

55

56

57

58

59

60

61

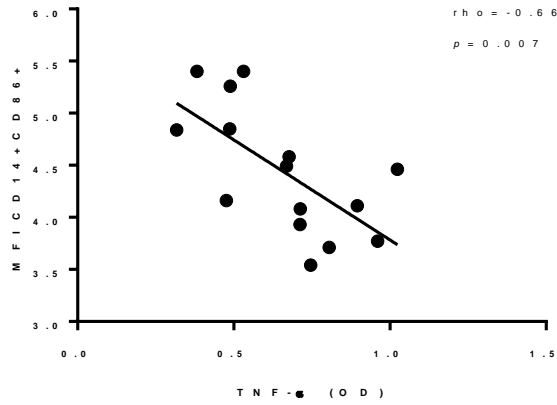

62

63 **Supplementary Figure 3. Relationship between the expression of CD86 in monocytes stimulated**  
 64 **with the five phage suspensions and the levels of TNF-α produced in their supernatants.**

65

66
